# Supplementary material for: Temperature reconfigurable skyrmionic solitons in cholesteric liquid crystals
Source: Royal Society of Chemistry journal article supplement (doi:10.1039/d3sm00279a), 2023-01-01
Supplement: d3sm00279a7.pdf [file d3sm00279a7.pdf]

Supplementary Movie 1. The transformation of a single toron into cholesteric fingers corresponding to Fig. 7a in the manuscript. The sample temperature is gradually increased from 83 °C to 84.2 °C at 0.2 °C min<sup>-1</sup>. The movie is speeded up by 10 times.

Supplementary Movie 2. The transformation of cholesteric fingers back to a single toron corresponding to Fig. 7b in the manuscript. The sample temperature is gradually decreased from 84.2 °C to 83 °C at -0.2 °C min<sup>-1</sup>. The movie is speeded up by 10 times.

Supplementary Movie 3. The transformation of a single toron into cholesteric fingers corresponding to Fig. 8a in the manuscript. The sample temperature is gradually increased from 83 °C to 90.6 °C at 2 °C min<sup>-1</sup>. The movie is speeded up by 10 times.

Supplementary Movie 4. The transformation of cholesteric fingers into two torons corresponding to Fig. 8b in the manuscript. The sample temperature is gradually decreased from 90.6 °C to 83 °C at -2 °C min<sup>-1</sup>. The movie is speeded up by 10 times.

Supplementary Movie 5. The transformation of torons into cholesteric fingers and toron aggregates corresponding to Fig. 9a in the manuscript. The sample temperature is gradually increased from 83.2 °C to 84.5 °C at 0.2 °C min<sup>-1</sup>. The movie is speeded up by 10 times.

Supplementary Movie 6. The transformation of cholesteric fingers and toron aggregates into torons corresponding to Fig. 9b in the manuscript. The sample temperature is gradually decreased from 84.5 °C to 83.2 °C at -0.2 °C min<sup>-1</sup>. The movie is speeded up by 10 times.
